# Supplementary material for: Electrical resistance characteristics of thermally modified wood
Source: Springer Nature journal article supplement (doi:10.1007/s00107-022-01813-7), 2022-04-11
Supplement: MOESM1 [file 20303434]

## Sheet: Sheet1
Board	modified	sorption	Moisture content	Electrical resistance	T
			%	10 log Ω	°C
random	no	n/a	4.43354	116.8	25.6
random	no	adsorption	6.92685	114.3	25.2
random	no	desorption	7.76539	109.7	25.4
random	no	adsorption	11.3292	94.7	25.3
random	no	desorption	12.4309	89.1	25.25
random	no	adsorption	17.1989	74.9	25.35
random	no	desorption	18.6396	74	25.3
random	no	desorption	17.3417	68.5	50.6
random	no	desorption	18.5236	83.5	3.6
random	no	n/a	19.7681	71.7	25.4
135	no	n/a	4.35478	117.9	25.6
135	no	adsorption	6.84932	115.7	25.2
135	no	desorption	7.66484	111.9	25.4
135	no	adsorption	11.3054	94	25.3
135	no	desorption	12.1689	90.5	25.25
135	no	adsorption	16.8648	75.3	25.35
135	no	desorption	18.5225	73.1	25.3
135	no	desorption	17.126	68.4	50.6
135	no	desorption	18.4212	82	3.6
135	no	n/a	19.6631	70.2	25.4
135	no	adsorption	25.5996	66.2	19.9
169	no	n/a	4.38716	119.7	25.6
169	no	adsorption	6.88071	118.9	25.2
169	no	desorption	7.71034	117.9	25.4
169	no	adsorption	11.5819	106	25.3
169	no	desorption	12.6178	105.4	25.25
169	no	adsorption	18.0033	84.5	25.35
169	no	desorption	19.5735	84.3	25.3
169	no	desorption	17.9049	76.9	50.6
169	no	desorption	19.2079	99.3	3.6
169	no	n/a	20.839	81	25.4
169	no	adsorption	26.865	64.7	19.9
177	no	n/a	4.46193	119.7	25.6
177	no	adsorption	6.96678	118.8	25.2
177	no	desorption	7.76356	116.4	25.4
177	no	adsorption	10.9755	98.3	25.3
177	no	desorption	12.2753	96.6	25.25
177	no	adsorption	17.3149	78.1	25.35
177	no	desorption	19.2271	77.1	25.3
177	no	desorption	17.2999	73.2	50.6
177	no	desorption	18.754	89.1	3.6
177	no	n/a	20.3476	73.3	25.4
177	no	adsorption	26.3121	66.1	19.9
random	yes	n/a	2.91699	121.9	25.6
random	yes	adsorption	4.66608	119	25.2
random	yes	desorption	5.03893	116.6	25.4
random	yes	adsorption	6.88672	105.6	25.3
random	yes	desorption	7.65983	99.8	25.25
random	yes	adsorption	10.1108	84.3	25.35
random	yes	desorption	11.2622	80.4	25.3
random	yes	desorption	10.6042	73.3	50.6
random	yes	desorption	11.4925	89.9	3.6
random	yes	n/a	11.7283	78.5	25.4
135	yes	n/a	2.82865	118.8	25.6
135	yes	adsorption	4.56181	118.1	25.2
135	yes	desorption	4.91607	117.2	25.4
135	yes	adsorption	6.23501	109.3	25.3
135	yes	desorption	7.59756	101	25.25
135	yes	adsorption	10.1755	84.1	25.35
135	yes	desorption	11.3691	80.2	25.3
135	yes	desorption	10.5843	73.6	50.6
135	yes	desorption	11.5707	89.6	3.6
135	yes	n/a	11.8269	77.8	25.4
135	yes	adsorption	16.9274	71.7	19.9
169	yes	n/a	2.89648	119.1	25.6
169	yes	adsorption	4.52943	118.8	25.2
169	yes	desorption	4.85266	117.5	25.4
169	yes	adsorption	6.30929	110.6	25.3
169	yes	desorption	7.30837	102.6	25.25
169	yes	adsorption	9.68433	84.6	25.35
169	yes	desorption	10.8219	81	25.3
169	yes	desorption	10.0495	74.1	50.6
169	yes	desorption	10.9437	90.9	3.6
169	yes	n/a	11.2585	78.5	25.4
169	yes	adsorption	16.6016	70.6	19.9
177	yes	n/a	2.74256	120.8	25.6
177	yes	adsorption	4.40442	120.2	25.2
177	yes	desorption	4.71182	119.3	25.4
177	yes	adsorption	6.00384	112.8	25.3
177	yes	desorption	7.31988	109	25.25
177	yes	adsorption	9.81748	88.8	25.35
177	yes	desorption	10.999	87.2	25.3
177	yes	desorption	10.0624	80.2	50.6
177	yes	desorption	11.0711	100.2	3.6
177	yes	n/a	11.4505	82.9	25.4
177	yes	adsorption	16.6627	72.7	19.9
